# Supplementary material for: Tonic inhibition of the chloride/proton antiporter ClC-7 by PI(3,5)P2 is crucial for lysosomal pH maintenance
Source: eLife journal article supplement (doi:10.7554/elife.74136), 2022-06-07

# Figure 5 Supplement 1

Agarose Gel of RT-PCR products of GAPDH (positive control), CIC-7 WT, and CIC-7 KO U2OS cells

Probe:  
Cells:

GAPDH

CIC-7

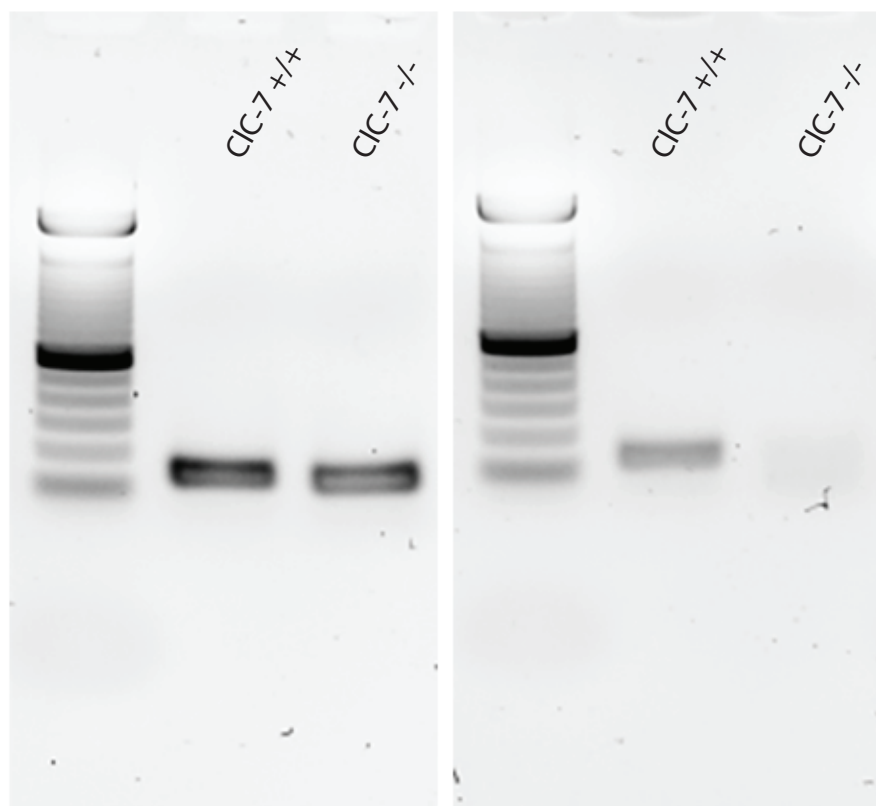

Supplement: supp [file elife-74136-supp-v1.zip]
