# Supplementary material for: Tonic inhibition of the chloride/proton antiporter ClC-7 by PI(3,5)P2 is crucial for lysosomal pH maintenance
Source: eLife journal article supplement (doi:10.7554/elife.74136), 2022-06-07
Supplement: supp [file elife-74136-supp-v1.zip]

## Figure 4B Labeled Gels

### Blot--anti PIKfyve

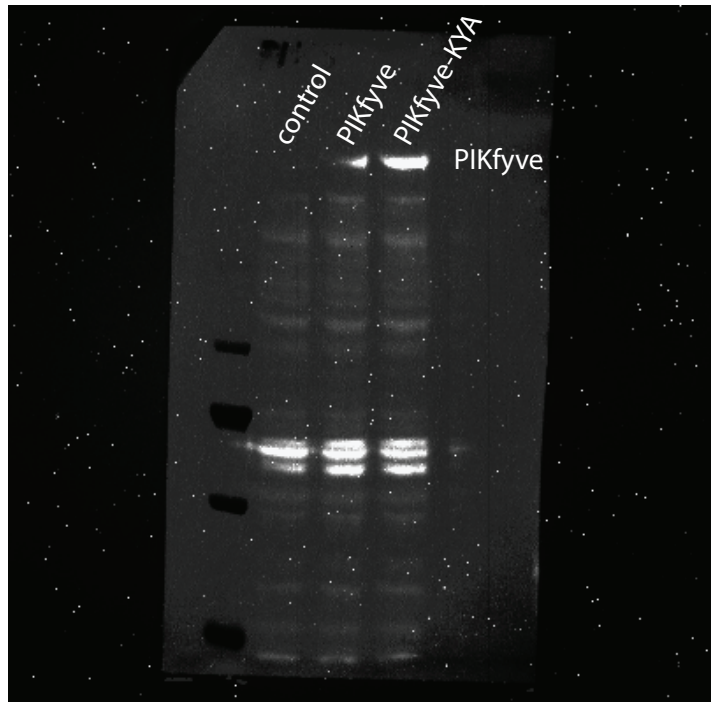

### Blot--anti tubulin

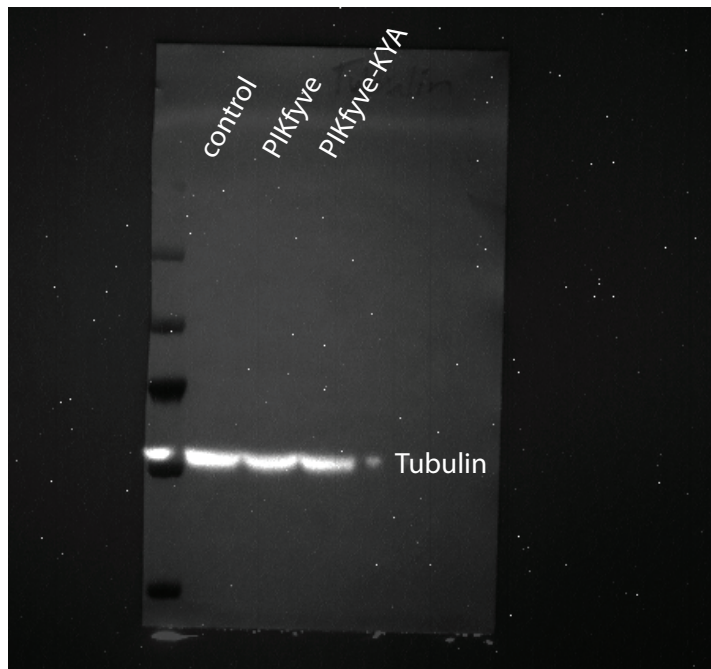

Note that these are two images of the same blot probed with different antibodies. A photo of the blot imaged in white light (to visualize the MW standards) is superimposed on the chemiluminescent image of the same blot.
