# Supplementary figures and images for: Tonic inhibition of the chloride/proton antiporter ClC-7 by PI(3,5)P2 is crucial for lysosomal pH maintenance
Source: eLife journal article supplement (doi:10.7554/elife.74136), 2022-06-07

Figure 5A Agarose Gel of PCR product amplified from CLCN7 deletion site of WT and CLCN7 KO U2OS cells

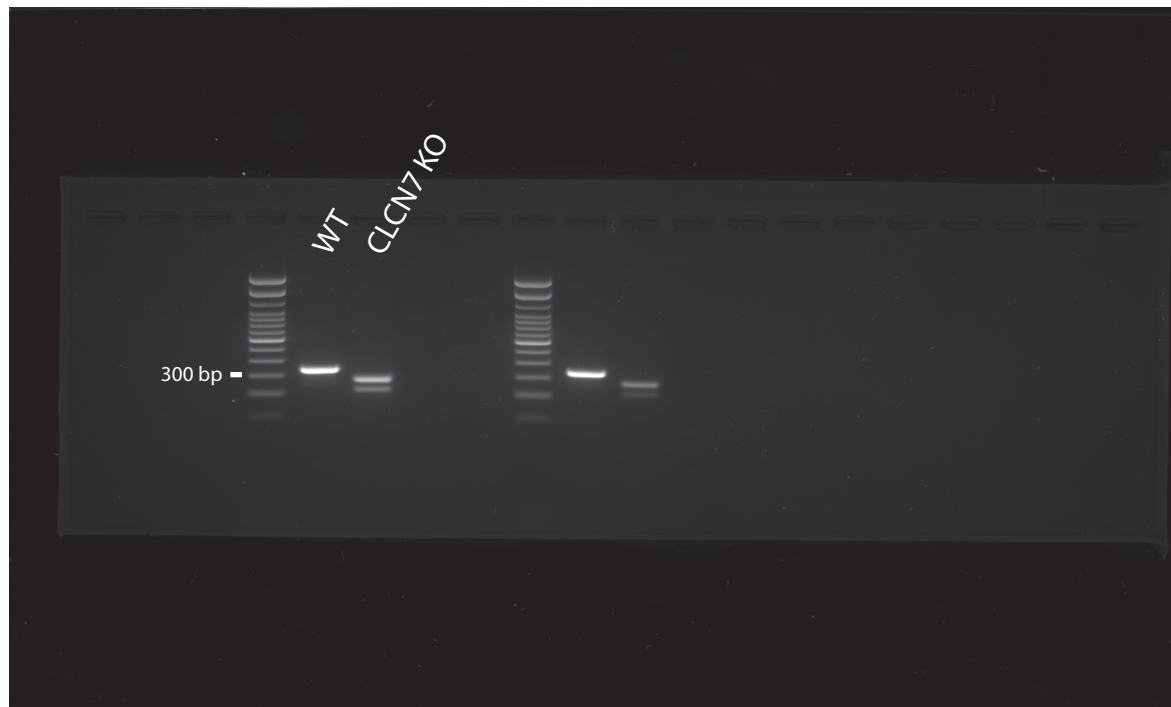

Supplement: supp [file elife-74136-supp-v1.zip]
